# Supplementary material for: Preparation and performance of novel Ni-doped iron oxychloride with high singlet oxygen generation
Source: Royal Society of Chemistry journal article supplement (doi:10.1039/d2nj00440b), 2022-01-01
Supplement: d2nj00440b1.pdf [file d2nj00440b1.pdf]

## **Supporting Information**

### **Preparation and performance of Novel Ni-doped Iron oxychloride with High singlet oxygen generation**

**Deli Lu\*, Zhe Chen, Qidong Yang & Sheng Han**

School of Chemical and Environmental Engineering, Shanghai Institute of  
Technology, Haiquan Road 100, Shanghai 201418, PR China.

\*Corresponding authors: [ldl@sit.edu.cn](mailto:ldl@sit.edu.cn) (Deli Lu).

**Table S1** Total elemental Maps of Ni-20.

| Elements  | Types | Apparent concentration | k value | Wt%    | Wt% Sigma | Standard         |
|-----------|-------|------------------------|---------|--------|-----------|------------------|
| O         | K     | 16.50                  | 0.05552 | 21.69  | 0.11      | SiO <sub>2</sub> |
| Cl        | K     | 23.55                  | 0.20577 | 32.62  | 0.10      | NaCl             |
| Fe        | K     | 19.74                  | 0.19744 | 30.59  | 0.13      | Fe               |
| Ni        | K     | 9.42                   | 0.09419 | 15.09  | 0.14      | Ni               |
| Summary : |       |                        |         | 100.00 |           |                  |

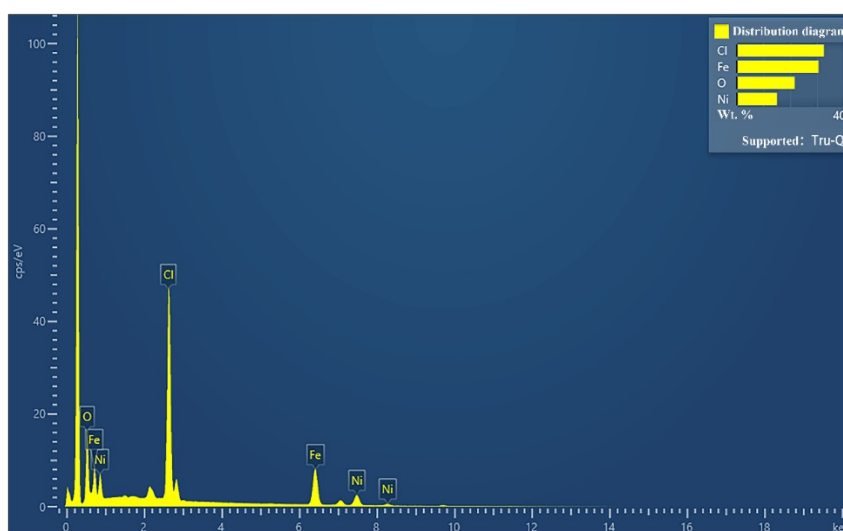

**Fig. S1** Total elemental Maps of Ni-20.

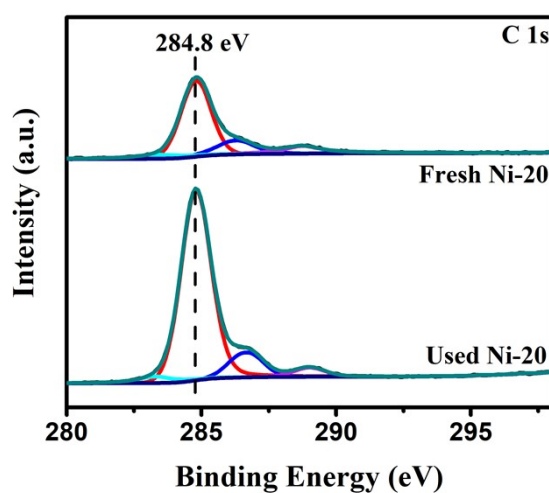

**Fig. S2** C 1s spectrum of fresh Ni-20 and used Ni-20.

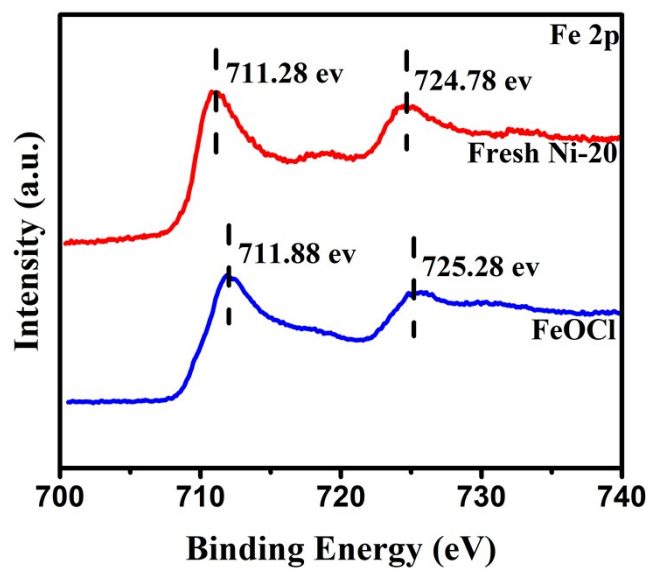

Fig. S3 Fe 2p spectrum of fresh Ni-20 and FeOCl.

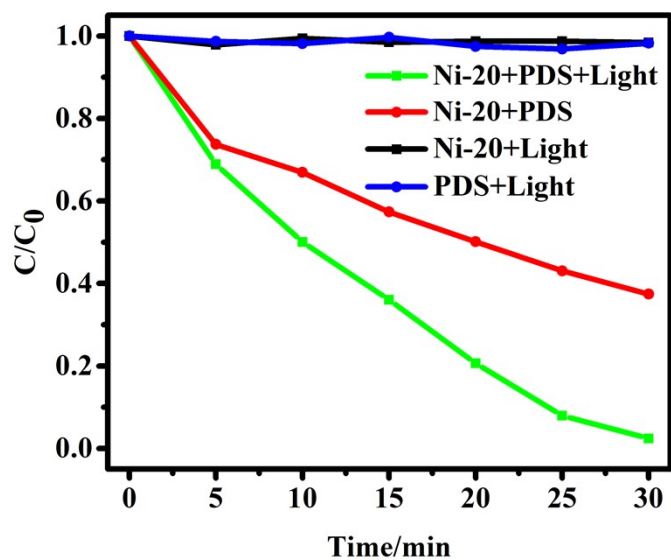

Fig. S4 Phenol degradation under different conditions.

Condition: 0.8 g/L Ni-20, 2 mM PDS, 20 mg/L phenol, initial pH 6.5, visible light;

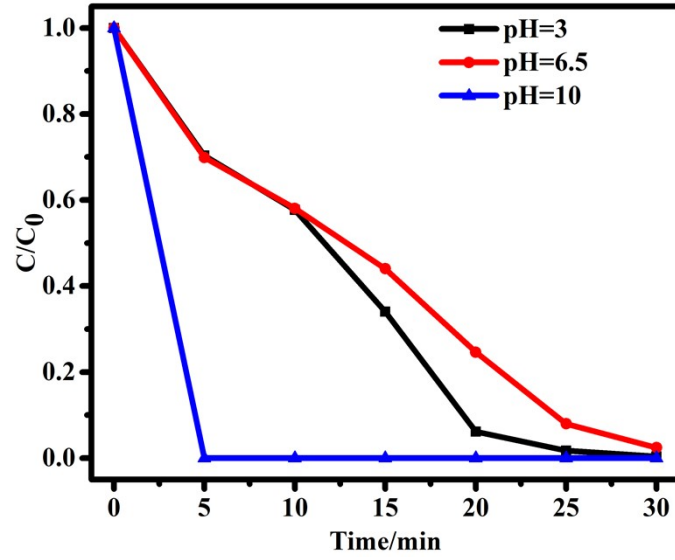

**Fig. S5** Phenol degradation under different initial pH.

Condition: 0.8 g/L Ni-20, 2 mM PDS, 20 mg/L phenol, visible light;

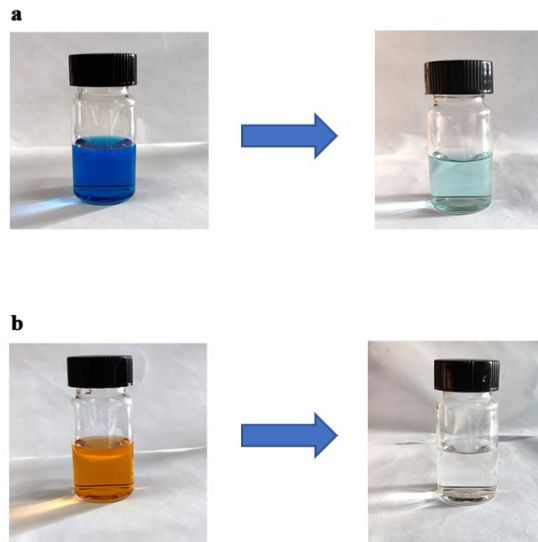

**Fig. S6** Degradation of 20 mg/L methylene blue (a) and acid Orange II (b).

Condition: 0.1 g/L Ni-20, 1 mM PDS, visible light, 10 min.

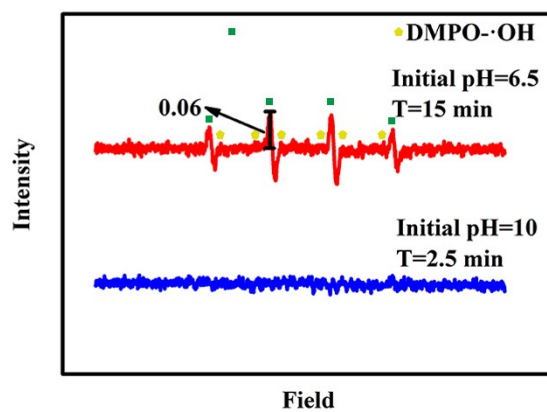

Fig. S7 EPR spectra of  $\text{SO}_4^{\cdot-}$  and  $\cdot\text{OH}$ .

Conditions: 0.8 g/L Ni-20, 2 mM PDS, visible light, 15min, 200mM DMPO for initial pH 6.5; 0.2 g/L Ni-20, 0.5 mM PDS, visible light, 2.5 min, 200 mM DMPO for initial pH 10.

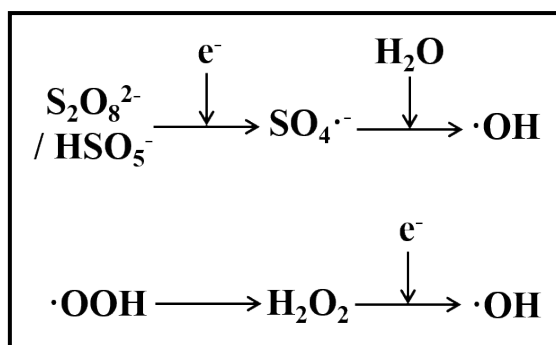

Fig. S8 Origin of possible  $\text{SO}_4^{\cdot-}$  and  $\cdot\text{OH}$
